# Supplementary material
Source: publisher figshare collection journal article supplement (https://tandf.figshare.com/ndownloader/files/13902578)
Supplement: Supplementary file 1 [file 13902578]

**Table S6.** The MMP-12 inhibitors in the external independent evaluation set.

| Index | Name | Structure |
| --- | --- | --- |
| 1 | 1.mol |  |
| 2 | 2.mol |  |
| 3 | 3.mol |  |
| 4 | 4.mol |  |
| 5 | 5.mol |  |
| 6 | 6.mol |  |
| 7 | 7.mol |  |
| 8 | 8.mol |  |
| 9 | 9.mol |  |
| 10 | 10.mol |  |
| 11 | 11.mol |  |
